# Supplementary material
Source: MDPI journal article supplement (https://www.mdpi.com/2227-9717/10/6/1044)

**Supplementary material**

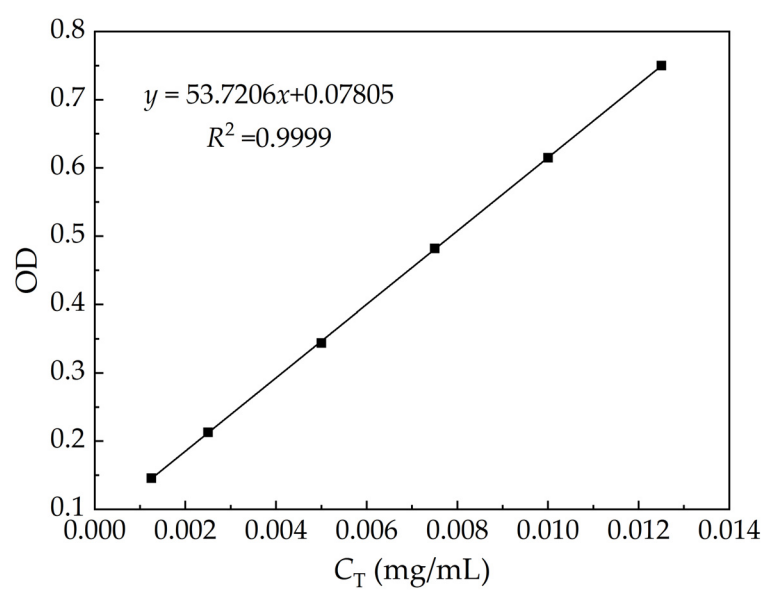

**Figure S1.** Standard curve of glucose.

Supplement: s1 [file s1]
